1                   **Comparison of materials for rapid passive collection of environmental DNA**

2

3   Bessey\*<sup>1,2,3</sup> Cindy, Gao<sup>4</sup> Yuan, Truong<sup>4</sup> Yen Bach, Miller<sup>2</sup> Haylea, Jarman<sup>3, 5</sup> Simon Neil, and  
4   Berry<sup>2</sup> Oliver

5

6   1. Commonwealth Scientific and Industrial Research Organisation, Indian Oceans Marine  
7   Research Centre, Oceans and Atmosphere, 64 Fairway, Crawley, WA, 6009, Australia

8   2. Commonwealth Scientific and Industrial Research Organization, Indian Oceans Marine  
9   Research Centre, Environomics Future Science Platform, 64 Fairway, Crawley, WA, 6009,  
10   Australia

11   3. University of Western Australia, UWA Oceans Institute, 35 Stirling Highway, Crawley, WA,  
12   6009, Australia

13   4. Commonwealth Scientific and Industrial Research Organization, Manufacturing, Research  
14   Way, Clayton, Vic, 3168, Australia

15   5. University of Western Australia, School of Biological Sciences and the UWA Oceans  
16   Institute, 35 Stirling Highway, Crawley, WA, 6009, Australia

17

18   \*Corresponding Author: [Cindy.Bessey@csiro.au](mailto:Cindy.Bessey@csiro.au)

19 *Abstract*

20 Passive collection is an emerging sampling method for environmental DNA (eDNA) in aquatic  
21 systems. Passive eDNA collection is inexpensive, efficient, and requires minimal equipment,  
22 making it suited to high density sampling and remote deployment. Here, we compare the  
23 effectiveness of nine membrane materials for passively collecting fish eDNA from a 3 million  
24 litre marine mesocosm. We submerged materials (cellulose, cellulose with 1% and 3% chitosan,  
25 cellulose overlaid with electrospun nanofibers and 1% chitosan, cotton fibres, hemp fibres and  
26 sponge with either zeolite or active carbon) for intervals between five and 1080 minutes. We  
27 show that for most materials, with as little as five minutes submersion, mitochondrial fish eDNA  
28 measured with qPCR, and fish species richness measured with metabarcoding, was comparable  
29 to that collected by conventional filtering. Furthermore, PCR template DNA concentrations and  
30 species richness were generally not improved significantly by longer submersion. Species  
31 richness detected for all materials ranged between 11 to 37 species, with a median of 27, which  
32 was comparable to the range for filtered eDNA (19-32). Using scanning electron microscopy,  
33 we visualised biological matter adhered to the surface of materials, rather than entrapped, with  
34 images also revealing a diversity in size and structure of putative eDNA particles.  
35 Environmental DNA can be collected rapidly from seawater with a passive approach and using a  
36 variety of materials. This will suit cost and time-sensitive biological surveys, and where access to  
37 equipment is limited.

38 *Introduction*

39 Environmental DNA metabarcoding is a sensitive, non-invasive and broadly applicable tool for  
40 species detection, including biodiversity measurement and biosecurity surveillance (Taberlet et  
41 al. 2018, Deiner et al. 2017). Macro-organisms shed their DNA into the air, soil, and water,  
42 which can be sampled by collecting, extracting, amplifying, sequencing, and ultimately  
43 identified by comparing against a reference database of known DNA sequences (Taberlet et al.  
44 2018, Thomsen et al. 2015). Diverse applications have been developed for eDNA  
45 metabarcoding and the field has grown rapidly in recent years (Koziol et al. 2019, Jarman et al.  
46 2018). Nevertheless, a common limitation of eDNA studies is a lack of replication (Buxton et al.  
47 2021, Derocles et al. 2018, Dickie et al. 2018, Zinger et al. 2017). For aquatic systems this is in  
48 part due to the logistical challenge of filtering sufficient water (Bessey et al. 2020).

49  
50 Passive collection methods (Bessey et al, 2021, Kirtane et al. 2020), which involves direct  
51 submersion into a water body of materials that collect eDNA, facilitate increased replication  
52 because they are cheaper, simpler, and faster to apply than active filtration. This enables analyses  
53 that are generally not practical with water filtering as an eDNA collection method. Frequency of  
54 occurrence methods become more feasible, as well as mapping residence of species of interest.  
55 For studies investigating diversity, greater biological replication improves the reliability of both  
56 alpha and beta diversity estimates (Zinger et al. 2017, Prosser 2010). Furthermore, because  
57 passive eDNA requires minimal or no supporting technology it suits deployment to remote  
58 environments, and by non-experts.

59

60 Few studies investigate the mechanisms or optimal material properties needed for passive eDNA  
61 collection. Kirtane et al. (2020) used adsorbent-filled sachets of Montmorillonite clay and  
62 granular activated carbon to passively capture eDNA in freshwater laboratory, microcosm and  
63 field experiments. In the laboratory, they found that extracellular DNA adsorbed to these  
64 materials at different rates, depending on the water matrix. In their field experiments, granular  
65 activated carbon sachets captured significantly more eDNA than clay and detected as many fish  
66 species as a 1 L conventional grab sample. These materials were chosen for their high  
67 adsorption capacity to trap DNA but also for their low adsorption affinity to allow high yield  
68 during extraction. They suggest adsorption mechanisms for granular activated carbon are  
69 dependent on the water matrix, whereas that of clay is more dependent on adsorption kinetics  
70 and capacity. Bessey et al. (2021) compared the effectiveness of positively charged nylon and  
71 non-charged cellulose ester membrane materials for passive collection of fish eDNA at both a  
72 species-rich tropical and species-poor temperate marine site. They found that both materials  
73 detected fish as effectively as conventional active eDNA filtration methods in temperate systems  
74 and provided similar estimates of total fish biodiversity but differed in tropical waters. Their  
75 materials were chosen to investigate the possible role of electrostatic attraction and because both  
76 are commonly used in conventional aquatic eDNA studies using filtration methods. The  
77 observations that significant material effects exist, and may be system specific, indicates there is  
78 potential for improvements to passive eDNA collection through material selection that could  
79 create greater efficiencies for users.

80

81 The optimal submersion time for efficient passive eDNA collection is also unclear. Kirtane et al.  
82 (2020) found that, regardless of material used (clay or granular carbon) or water matrix

83 (molecular grade water, microcosm tank water, or natural creek water), an equilibrium  
84 concentration of eDNA was absorbed in less than 24 hours. In field trials, they also found that  
85 fish species detection did not significantly increase with longer submersion duration (7 days  
86 compared to 21). In both tropical and marine waters, Bessey et al. (2021) likewise found that  
87 increased submersion time did not increase species richness (comparing 4, 8, 12, and 24 hours of  
88 submersion). Combined, these studies indicate that long-duration submersion (days or hours)  
89 may not be necessary and therefore, investigations into minimal submersion times are another  
90 potential avenue to increase passive eDNA collection efficiency.

91  
92 Using a DNA metabarcoding approach, here we evaluate the effect of materials and submersion  
93 time on the efficiency with which fish eDNA could be collected passively from a large marine  
94 mesocosm. We also use scanning electron microscopy to visualise modes of eDNA adherence or  
95 entanglement to the different materials. We show that for most materials, passively collected  
96 eDNA consistently performs similarly to conventionally filtered eDNA samples, and that high  
97 collection efficiency can be achieved in as little as five minutes.

98

## 99 *Materials and Methods*

### 100 *Study Site and Design*

101 Sampling was conducted in the main tank at The Aquarium of Western Australia (AQWA;  
102 [aqwa.com.au](http://aqwa.com.au)), which offered a relatively controlled system containing 50 known fish species in  
103 three million litres of seawater. This system draws incoming seawater from 0.5 m below the  
104 seabed (natural sand filter) of the nearshore ocean waters. It is then filtered (pressure glass media  
105 filter) before entering the AQWA facility where the water supplies several display tanks before

106 entering the main tank of the mesocosm. The main tank has its own gravity filter system  
107 (volume of filter tank is 2 million litres) that uses a 50 cm sand bed with 2 mm ( $\pm$  0.5 mm) size  
108 particles, over 50 cm of 6 mm ( $\pm$  3 mm) gravel. The turnover rate between the gravity filter and  
109 main tank is 5 million litres every 2 hours. Passive eDNA sampling was conducted between  
110 8am and 4pm on January 21 and 22, 2021, by submerging nine different membrane materials just  
111 below the surface in the mesh pockets of a pearl oyster aquaculture frame (Fig.1, see Bessey et  
112 al. 2021). Each of the nine membrane materials were deployed in quadruplicate for specified  
113 time intervals (5, 10, 30, 60 minutes and overnight for 18 hours) to examine whether increased  
114 submersion time led to increased eDNA collection. Of the quadruplicate samples, three were  
115 used for eDNA extractions while the other was used for scanning electron microscopy to  
116 visualise how eDNA collected on the different membrane surfaces.

117

### 118 *Membrane Materials*

119 We trialled nine different membrane materials (Table 1). The first was a cellulose ester  
120 membrane (0.45  $\mu$ m Pall GN-6 Metrice<sup>®</sup>) commonly used in eDNA studies (Tsuji et al. 2019).  
121 To investigate whether chitosan coating would increase eDNA capture, the cellulose membranes  
122 were impregnated with either 1% or 3% chitosan (w/w) which was then crosslinked under  
123 glutaraldehyde vapour to confer stability. Loadings of chitosan on the membranes were  
124 confirmed by Fourier-transform infrared spectroscopy (FT-IR) as well as by staining with the  
125 anionic dye Eosin Y. Chitosan is a polycation polymer that efficiently binds anionic DNA under  
126 acidic conditions and has been used for DNA enrichment and purification (Pandit et al. 2015).  
127 Chitosan is derived from chitin in crustacean shells and is readily available, inexpensive and  
128 biocompatible. To investigate if eDNA would become entrapped in highly complex materials,

129 we trialled overlaying the cellulose esters with electrospun nanofibres, while also trialling a  
130 combination of electrospun nanofibers that were subsequently covered in a 1% chitosan (w/w).  
131 Electrospinning is a technique for producing fibres from submicron down to nanometer in  
132 diameter with high surface area (Bhardwaj and Kundu 2010). We used solution electrospinning,  
133 where the polymer(s) and other additive materials are firstly dissolved in a suitable solvent at an  
134 optimized concentration before electrospinning. A high Voltage electric field is applied to the  
135 droplet of fluid coming out of the tip of a die or spinneret, which acts as one of the electrodes.  
136 When the electric field supply is strong enough, it will lead to the droplet formation and finally  
137 to the ejection of a charged jet from the tip of the cone accelerating toward the counter collector  
138 electrode leading to the formation of a nanofibrous membrane. These nanofibrous membranes  
139 have found applications in many areas, including biomedical areas (e.g., scaffolds for tissue  
140 engineering, drug delivery, wound dressing, and medical implants), filtration, protective textiles,  
141 and battery cells (Gao et al. 2014). Our electrospinning was carried out using polyether based  
142 thermoplastic polyurethane (TPU) grade (RE-FLEX® 585A, Townsend Chemicals) with a 10%  
143 w/v solution in dimethyl formamide solvent (DMF) using a 23 G needle spinneret, with an  
144 applied voltage of 20kV at 15 cm from the collecting drum. To ensure sufficient physical  
145 robustness for use in the marine environment, a composite was prepared using a thermal bonding  
146 [Protechnic 114P (13 gsm)] net material to bond the electrospun membrane attached through  
147 thermal adhesive. This backing plate was needed to prevent the nanofibre cellulose membranes  
148 from curling, and therefore, we also trialled these backing plates separately in the downstream  
149 processing to determine their effect on eDNA capture. We also trialled natural fibres, cotton and  
150 hemp, which were contained in a nylon bag for practical deployment purposes so they would  
151 remain anchored within the mesh of the pearl frame. A subset of nylon bags was retained for

152 downstream processing in the same fashion as the trialled materials. These cotton and hemp  
153 fibres were 5 mm in diameter and cut into 40 mm lengths so they could fit in a 2 mL Eppendorf  
154 tube for DNA extraction. Finally, we trialled two sponge materials that would be highly robust  
155 in aquatic settings: one was a tightly woven filter pad with 100% active carbon (Aqua One®),  
156 while the other was a tightly woven filter pad with zeolite (Aqua One®). The sponge was cut  
157 into 40 mm rectangular lengths and had a 5 mm width and depth. All materials were placed  
158 under ultra-violet sterilizing light for a minimum of 30 min, except for the cellulose membranes  
159 which were certified sterile upon purchase.

160

### 161 *Scanning Electron Microscopy*

162 We used scanning electron microscopy (SEM) to qualitatively investigate how biological matter  
163 attaches to each of the different materials. Scanning electron microscopy uses a focused beam of  
164 high-energy electrons to generate a variety of signals at the surface of solid specimens. These  
165 signals are converted into 2-dimensional high-resolution images and reveal information about the  
166 external morphology (texture), chemical composition, and crystalline structure and orientation of  
167 materials making up the sample. A subsection of each membrane material was dissected using  
168 sterile surgical scissors and mounted onto 10 mm diameter SEM stubs with an adhesive carbon  
169 tab to prevent charge build-up. The stubs were then air dried at ambient temperature in a fume  
170 hood while partially covered to prevent dust or debris on the samples. Once completely dry,  
171 samples were coated with a thin layer of platinum (sputter coated with 3 nm of platinum using a  
172 Leica EM MED020; Leica Microsystems, Inc. Buffalo Grove, IL); a fine conducting material for  
173 high resolution electron imaging. The samples were visualized and imaged on a Zeiss 1555 VP-  
174 FESEM with SmartSEM software (Zeiss, Germany) at the Centre for Microscopy,



175 Characterisation and Analysis (CMCA), University of Western Australia, Perth, Western  
176 Australia. We provide example SEM images of materials at 10,000 x (cellulose) and 100 x  
177 (cotton, hemp, sponge – active carbon and sponge - nitrate) magnification prior to deployment  
178 (Table 1) and provide an example of all deployed materials with biological matter attached. Due  
179 to limited supplies of chitosan and electrospun nanofiber covered cellulose membranes, none  
180 were available for SEM imaging prior to deployment.

181

#### 182 *Active eDNA Collection*

183 We collected water for active eDNA filtration to compare to the results of passive eDNA  
184 collection. Five 1 L surface water samples were collected in sterile 1 L containers at five  
185 different times over the day and filtered with cellulose ester membranes (47 mm diameter, 0.45  
186 µm pore size) using a peristaltic Sentino® Microbiology Pump on a clean benchtop at the  
187 aquarium facility. All water samples were taken on the first day.

188

#### 189 *Contamination control*

190 Sterile technique was used throughout the experiment and consisted of wearing gloves and using  
191 sterile tweezers to handle all materials. All materials were frozen after collection and stored at  
192 –20°C until further processing in the laboratory. All collection and deployment apparatus were  
193 sterilized by soaking in 10% bleach solution for at least 15 minutes and rinsed in deionized  
194 water.

195

196 *eDNA extraction from passive collection materials*

197 All cellulose ester materials, as well as the nylon bags, were cut or flash frozen (-80°C) and  
198 crushed into small pieces that were placed in a 2 mL Eppendorf tube in preparation for  
199 extraction. All other materials were placed directly into a 2mL Eppendorf tube as is for  
200 extraction. Total nucleic acid was extracted from all materials in the same fashion using a  
201 DNeasy Blood and Tissue Kit (Qiagen; Venlo, Netherlands), with an additional 40 µL of  
202 Proteinase K used during a three-hour digestion period at 56°C on rotation (300 rpm). DNA was  
203 eluted into 200 µL AE buffer. All extractions took place in a dedicated DNA extraction  
204 laboratory using a QIAcube (Qiagen; Venlo, Netherlands), where benches and equipment were  
205 routinely bleached and cleaned.

206

207 *DNA metabarcode amplification for fish detection*

208 We followed the same procedures used by Bessey et al. (2021). One-step quantitative  
209 polymerase chain reactions (qPCR) were performed in duplicate for each sample using 2 µL of  
210 extracted DNA and a mitochondrial DNA 16S rDNA universal primer set targeting fish taxa  
211 (16SF/D  
212 5' GACCCTATGGAGCTTTAGAC 3' and 16S2R-degenerate 5'  
213 CGCTGTTATCCCTADRGTA ACT 3'; Berry et al. 2017, Deagle et al. 2007), with the addition  
214 of fusion tag primers unique to each sample that included Illumina P5 and P7 adaptors. A single  
215 round of qPCR was performed in a dedicated PCR laboratory. Quantitative PCR reagents were  
216 combined in a dedicated clean room and included 5 µL AllTaq PCR Buffer (QIAGEN; Venlo,  
217 Netherlands), 0.5 µL AllTaq DNA Polymerase, 0.5 µL dNTPs (10 mM), 1.0 µL Ultra BSA (500

218  $\mu\text{g}/\mu\text{L}$ ), SYBR Green I (10 units/ $\mu\text{L}$ ), 0.5  $\mu\text{L}$  forward primer (20  $\mu\text{M}$ ) and 5.0  $\mu\text{L}$  reverse primer  
219 (20  $\mu\text{M}$ ), 2  $\mu\text{L}$  of DNA and Ultrapure™ Distilled Water (Life Technologies) made up to 25  $\mu\text{L}$   
220 total volume. Mastermix was dispensed manually and qPCR was performed on a CFX96  
221 Touch™ Real-Time PCR Detection System (Bio-Rad, California, USA) using the following  
222 conditions: initial denaturation at 95°C for 5 min, followed by 40 cycles of 30 s at 95°C, 30 s at  
223 the primer annealing temperature 54°C, and 45 s at 72°C, with a final extension for 10 min at  
224 72°C. All duplicate qPCR products from the same subsample were combined prior to library  
225 pooling. The mean Cq value from qPCR duplicates was used as an indication of initial DNA  
226 copy number. A sequencing library was made by pooling amplicons into equimolar ratios based  
227 on qPCR Ct values and sequenced on an Illumina Miseq platform (Illumina; San Diego, USA).  
228 The libraries were size selected using a Pippin Prep (Sage Science, Beverly, USA) and purified  
229 using the Qiaquick PCR Purification Kit (Qiagen; Venlo, Netherlands). The volume of purified  
230 library added to the sequencing run was determined by quantifying the concentration (Murray et  
231 al. 2015) using a Qubit 4 fluorometer (ThermoFisher Scientific). The library was unidirectionally  
232 sequenced using a 300 cycle MiSeq® V2 Reagent Kit and standard flow cell.  
233  
234 PCR plates included blank laboratory extraction controls (extraction reagents used with no DNA  
235 template), PCR negative controls (2  $\mu\text{L}$  of DI water used rather than DNA template) and positive  
236 controls (dhufish; *Glaucosoma hebraicum* and swordfish; *Xiphias gladius*). Dhufish inhabit the  
237 mesocosm, whereas swordfish do not, so the latter was a more appropriate positive control. No  
238 negative control (extraction or PCR) contained more than 17 reads, with the maximum number  
239 of reads per fish species being four. Therefore, we used a detection rate of greater than five  
240 sequences to classify something as a positive detection. All positive controls amplified multiple

241 reads identifying dhufish and swordfish with 100% identity. Swordfish was not detected in any  
242 sample except for our positive PCR control.

243

#### 244 *DNA sequence data processing*

245 Our DNA sequence data processing is detailed in Bessey et al. (2021), it directly follows the  
246 procedure described at <https://pythonhosted.org/OBITools/wolves.html>, and we briefly outline  
247 those procedures here again. Data generated by Illumina sequencing were processed using  
248 OBITools (<https://pythonhosted.org/OBITools/>) command ‘ngsfilter’ to assign each sequence  
249 record to the corresponding sample based on tag and primer. Then ‘obiuniq’ was used to  
250 dereplicate reads into unique sequences. Reads less than 190 bp and with counts less than 10  
251 were discarded. Denoising was performed using ‘obiclean’ to retain only sequences with no  
252 variants containing a count greater than 5% of their own. Sequences were assigned to taxa using  
253 ‘ecotag’ and a result table was generated using ‘obiannotate’. Our reference database was built  
254 in silico using our universal fish primer assay on 03/08/2021. Only fish species with identities  $\geq$   
255 90% and whose sequence variants could be assigned to at least family (and lower) were included.  
256 All variants were assigned a single name (eg. to family, genus or species) and directly compared  
257 to the known species in the mesocosm (Table 2). For example, an assignment to genus could be  
258 compared to the species of that genus which are known to inhabit the mesocosm.

259

#### 260 *Statistics*

261 A Box-Cox transformation normalized the data (Shapiro-Wilks Test), which allowed for the use  
262 of parametric statistics. We used an analysis of variance on the linear model fit of mean Cq  
263 value by material, followed by a Tukey Honest Significant Difference to compare materials. We

264 also used an analysis of variance on the linear model fit between mean Cq value and submersion  
265 duration for each material. A linear model fit of mean Cq values by material and submersion  
266 duration, and their interactions, produced the same results. These statistics were likewise used to  
267 determine differences in the number of species detected between materials and submersion  
268 intervals. We fit a smoothing spline to the interval data for a visual estimation of how mean Cq  
269 values and species detections varied with time. All statistics and graphics were produced using  
270 R (version 2.14.0; R Development Core Team 2011) and graphics were edited in Inkscape  
271 (<https://inkscape.org/>).

272

## 273 *Results*

### 274 *Multiple Materials Enable Passive eDNA Collection*

275 All nine membrane materials collected detectable fish eDNA (Fig. 2). Although significant  
276 differences in mean Cq values existed between materials ( $F = 21.69$ ,  $df = 11$ ;  $p < 0.001$ ), with  
277 cotton and hemp fibres exhibiting higher mean Cq values, all other materials were similar to each  
278 other, including to those obtained from conventionally filtering five 1L samples. Both cotton  
279 and hemp were deployed within nylon bags, and the mean Cq values for the nylon bags (22.3,  
280 23.1, 23.7; min, mean, max) were not significantly different than that of the filtered 1L samples  
281 (21.1, 23.5, 28.5), nor most other materials. Additionally, the mean Cq values of the nylon bags  
282 were lower than that of the zeolite sponge ( $p = 0.01$ ). The backing plate attached to the  
283 electrospun nanofibre covered cellulose membranes did not inhibit eDNA collection, as  
284 evidenced by their comparable mean Cq values.

285

286 *Increased Submersion Time Did Not Increase eDNA Collection*

287 No significant differences in mean Cq values were detected over time for any of the nine trialled  
288 materials (Fig. 3;  $F = 1.28$  for submersion time \* material,  $df = 9$ ,  $p = 0.25$ ). Smoothing splines  
289 were fitted to the time interval data for each material, and a trend downward would be indicative  
290 that the material collected more eDNA over time. Only hemp and both sponge materials showed  
291 any decline in trendline over time.

292

293 *The Majority of Fish Species were Detected with All Materials*

294 For all materials, we assigned 8,822,884 sequence reads to 71 fish taxa (Table 2). Of the 50  
295 species known to inhabit the mesocosm, 37 (74%) were detected through passive eDNA. The  
296 additional 34 species detected include known feed taxa, fish found in local intake waters, and  
297 fish occupying tanks within the same facility and within the same water system. The number of  
298 species detected differed between materials (Fig.4;  $F=21.69$ ,  $df=11$ ,  $p < 0.01$ ), with cotton, hemp  
299 and nylon detecting the fewest number of fish species on average. However, all materials  
300 detected a comparable number of species to the conventionally filtered eDNA samples.  
301 The median number of fish species detected by material was 27 (filtered eDNA; range = 19-32),  
302 29 (cellulose; 19-33), 31 (chitosan - 1%; 17, 36), 31 (chitosan - 3%; 23, 37), 29 (espun; 22, 31),  
303 26.5 (espun with chitosan; 21, 36), 19.5 (cotton; 11, 28), 24 (hemp; 14, 30), 24 (nylon bags; 18,  
304 29), 27 (sponge – active carbon; 13, 37) and 29 (sponge – nitrate; 21, 34). The number of  
305 species detected did not differ with submersion time for any of the nine trialled materials (Fig. 5;  
306  $F = 0.68$  for submersion time \* material,  $df = 9$ ,  $p = 0.72$ ).

307

308 *Scanning Electron Microscopy of eDNA Collection Materials*

309 The SEM images displayed how biological matter was adhered to the surface of all material  
310 (Fig.6) and did not appear entrapped or bound in any consistent manner. These images also  
311 revealed the diversity in size and structure of biological matter found on the materials. For  
312 example, a ‘slick’ of biological material can be seen on some materials (see Fig.6 cellulose and  
313 chitosan – 3%) while others contain small, rounded particles of biological material (see Fig. 6  
314 espun, cotton and hemp) or larger particles with irregular shapes that have a crystalline  
315 appearance or extremely smooth surface, consistent with inorganic materials and debris like salt  
316 crystals and sediment (see Fig.6 sponge – active carbon).

317

318 *Discussion*

319 We provide the first comprehensive evaluation of the capacity of a variety of porous materials to  
320 passively collect environmental DNA from a marine environment. Further, we also test the  
321 importance of submersion time. We reveal that numerous inexpensive materials are highly  
322 effective for the passive collection of eDNA. Remarkably, we also show that passive eDNA  
323 collection can be as effective as conventional water filtering and achieved quickly; in as little as  
324 five minutes.

325

326 *Materials*

327 We identify multiple materials that can be used effectively for passive eDNA collection.  
328 Material choice can influence capture efficiency, and ideally, the selected material will maximize  
329 eDNA capture without interfering or complicating the extraction process. We investigated the  
330 use of materials which varied in structural complexity and robustness, and found no significant

331 difference in capture efficiency, apart from the reduced capacity of hemp and cotton fibres that  
332 were contained in nylon bags. Kirtane et al. (2020) likewise found that the pore size used to  
333 encase the adsorbent had a significant impact on DNA adsorption. They suggest that restricted  
334 flow over the adsorbent was associated with smaller pore sizes, and that increasing encasing pore  
335 size increases capture. These results highlight the importance of membrane encasing and suggest  
336 the maximum surface area of a material should come in direct contact with the water.

337 There was also some indication that the addition of chitosan to a material could increase capture  
338 efficiency, since both chitosan treatments detected the highest median and maximum fish species  
339 richness. Although this was not statistically significant, our experiment was conducted in a low  
340 diversity, temperate mesocosm. Since water characteristics, such as pH and temperature, can  
341 influence DNA adsorption to different materials (Lorenz and Wackernagel 1987), it's possible  
342 the addition of chitosan could result in increased capture efficiencies in some environments. For  
343 example, Bessey et al. (2021) found that nylon membranes performed as well as conventional  
344 filtering for fish species detection in low-diversity temperate waters but not in high-diversity  
345 tropical waters, presenting a situation where the addition of chitosan could potentially increase  
346 the effectiveness of nylon materials. Further investigation into material optimization will be  
347 particularly important for high diversity systems.

348

349 Practical considerations for material choice will play an important role since our results reveal  
350 many materials are effective for passive eDNA collection. Cost of material, availability,  
351 robustness, ease of deployment and downstream processing, may all influence material choice.  
352 For example, nanomaterials are more time-consuming and costly to produce than readily  
353 available cellulose ester membranes and aquarium grade sponges, which are commercially



354 available (Liu 2012). Cellulose ester membranes require less handling time during downstream  
355 processing than granular materials, which require weighting, or sponge and nylon materials that  
356 require cutting prior to DNA extraction (Bessey et al. 2021). However, in a turbulent, high flow  
357 water environment, a more robust material, such as sponge, may be desirable over the more  
358 fragile cellulose membranes. A challenge for employing passive eDNA collection will be  
359 finding a standard that can be consistently used so that time series and spatial comparisons are  
360 meaningful within and between studies. This challenge similarly exists for conventional eDNA  
361 studies (Trujillo-Gonzalez et al. 2021).

362

### 363 *Time*

364 We determined that long submersion times are not necessary for passive eDNA collection and  
365 effective sampling can be achieved in as little as five minutes. Conventional eDNA filtration  
366 methods are time consuming, especially when considering the amount of water needed to  
367 effectively filter an area for accurate biodiversity estimates (Bessey et al. 2020, Koziol et al.  
368 2019). A quick eDNA collection method would have considerable benefit for end users and  
369 increase sampling capacity. Increased sampling capacity enables a broader range of ecological  
370 question to be addressed through comparative frequency analysis (Strickland et al. 2019), which  
371 are more powerful with larger sample sizes. Therefore, exploring the minimum amount of time  
372 required for passive eDNA collection membranes to saturate would be a worthwhile endeavour  
373 to maximize efficiency. In laboratory experiments, Kirtane et al. (2020) found no difference in  
374 adsorbed extracellular DNA concentrations over a time gradient between one min to two hours  
375 for granular active carbon in tank water, but that differed in creek waters. These previous studies  
376 indicate that site specific water chemistry affects the effectiveness of passive eDNA collection.

377 Therefore, a better understanding of the mechanism of eDNA adherence to materials could help  
378 optimize passive eDNA collection methods.

379

### 380 *Mechanism of eDNA Adherence to Materials*

381 The mechanism by which eDNA adheres to materials in natural aquatic systems remains unclear.

382 We used scanning electron microscopy to gain insight into the mechanism of attachment but  
383 found no consistent patterns. Despite trialling materials with a range of surface complexities, we  
384 found no supporting evidence that eDNA was entrapped within the interstitial spaces of the  
385 materials. Rather, biological matter appeared to adhere randomly to any available surface and  
386 showed great diversity in size and shape. For example, morphologically distinct single cell  
387 eukaryotes and bacteria could be seen on the surfaces of the membrane materials, many  
388 embedded in larger bodies of seemingly biological material, most likely biofilm. An important  
389 component of biofilm development is extracellular polymeric substances (Hancock 2001, Vilain  
390 et al. 2009) which are mainly comprised of polysaccharides, proteins, metabolites and  
391 extracellular DNA (Das et al. 2013). These extracellular polymeric substances occur in a range  
392 of molecular sizes, conformations and physical/chemical properties and although little is known  
393 about the physical ultrastructure of how they interact (Decho and Gutierrez 2017), they are  
394 known to adhere to both natural and engineered surfaces (Das et al. 2013). The diversity of  
395 biological compounds and structures that eDNA might be associated with in aquatic systems is  
396 huge. Dissolved organic matter (DOM) may contain more than 20,000 compounds in a single  
397 seawater sample (Mentges et al. 2017). Particulate organic matter (POM) as seen in Figure 6  
398 contains equal or greater diversity as well as structural complexity because much of it is derived

399 from dead organisms (Kharbush et al. 2020). A deeper understanding of the adhesive properties  
400 of different fractions of the POM pool and biofilms associated with passive eDNA collection  
401 materials may provide deeper insights into eDNA binding to collection materials.

402

#### 403 *Future Research*

404 We contribute to building evidence that passive eDNA collection is effective and offers  
405 important advantages over conventional water filtration methods, warranting further  
406 investigation. Studies conducted in environments where eDNA degrades quickly or is released in  
407 pulses may identify further advantages of passive eDNA collection. Although our study  
408 identified both rare and abundant species in a relatively low diversity mesocosm, future studies  
409 should evaluate the effectiveness of materials and submersion time in warmer, high diversity  
410 systems so that materials are effective for the maximum number of environmental conditions.  
411 Even in situations where passive eDNA collection may not perform as optimally as conventional  
412 filtering methods, the time and cost efficiencies may still warrant it's use, making cost-benefit  
413 analysis of which method to use a worthwhile consideration. Futures studies focussed on a  
414 mechanistic understanding of not only how eDNA adheres to materials, but investigating the  
415 physical/chemical properties of eDNA, could lead to the greatest advances in passive eDNA  
416 collection methods and optimization of materials.

417 *Data Availability*

418 Raw sequences, bioinformatic script, reference database, and the final datasets are available on  
419 the CSIRO Data Access Portal at [xxx](#) (raw sequence and final dataset) and  
420 <https://data.csiro.au/collections/collection/CIcsiro:46025v1> (bioinformatic script and reference  
421 database).

422

423 *Acknowledgments*

424 This project was funded by the CSIRO Environomics Future Science Platform. We thank Matt  
425 O'Malley and AQWA for allowing our experiments to be conducted at the facility. The authors  
426 acknowledge the facilities, and the scientific and technical assistance of the Australian  
427 Microscopy, Characterisation & Analysis, the University of Western Australia, a facility funded  
428 by the University, State and Commonwealth Governments. The authors also thank Sylvia  
429 Osterrieder and Zoe Slatter for their invaluable help during the mesocosm experiment and in the  
430 laboratory.

431

432 *Author Contributions*

433 CB, YG, YT, HM, SJ, OB– contributed intellectual direction  
434 CB– designed study  
435 YG, YT – designed membrane materials  
436 HM – conducted SEM imaging and interpretation  
437 CB – organized/participated in mesocosm sampling  
438 CB– performed molecular research  
439 CB – processed and analysed all data  
440 CB – conducted statistical analysis, produced graphics and tables  
441 CB, YG, YT, HM, SJ, OB– assisted with manuscript writing  
442 All authors contributed to manuscript revisions

443 *Competing Interest Statement*

444 The authors declare no competing interest.

445 *References*

- 446 Berry, T.E., Osterrieder, S.K., Murray, D.C., Coghlan, M.L., Richardson, A.J., Grealy, A.K.,  
447 Stat, M., Bejder, L., and Bunce, M. DNA metabarcoding for diet analysis and biodiversity: a  
448 case study using the endangered Australian sea lion (*Neophoca cinerea*). *Ecology and Evolution*, 4,  
449 7:5435-5453 (2017).
- 450 Bessey, C., Jarman, S.N., Simpson, T., Miller, H., Stewart, T., Keesing, J.K., & Berry, O.  
451 Passive eDNA collection enhances aquatic biodiversity analysis. *Communications Biology*, 4,  
452 236. <https://doi.org/10.1038/s42003-021-01760-8> (2021).
- 453 Bessey, C., Jarman, S.N., Berry, O., Olsen, Y.S., Bunce, M., Simpson, T., Power, M.,  
454 McLaughlin, J., Edgar, G.J., & Keesing, J. Maximizing fish detection with eDNA  
455 metabarcoding. *Environmental DNA*, 2(4), 493-504 (2020).
- 456 Bhardwaj, N., & Kundu, S.C. Electrospinning: a fascinating fiber fabrication technique.  
457 *Biotechnology Advances*, 28, 325-347 (2010).
- 458 Buxton, A., Matechou, E., Griffin, J., Diana, A., & Griffiths, R.A. Optimizing sampling and  
459 analysis protocols in environmental DNA studies. *Scientific Reports*, 11637 (2021).
- 460 Das, T., Sehar, S., & Manefield, M. The roles of extracellular DNA in the structural integrity of  
461 extracellular polymeric substance and bacterial biofilm development. *Environmental*  
462 *Microbiology Reports*, 5, 778-786 (2013).
- 463 Deagle, B.E., Gales, N.J., Evans, K., Jarman, S.N., Robinson, S., Trebilco, R., and Hindell, M.A.  
464 Studying seabird diet through genetic analysis of faeces: a case study on Macaroni penguins  
465 (*Eudyptes chrysolophus*). *PloS ONE*, 2(9):e831 (2007).
- 466 Decho, A.W. & Gutierrez, T. Microbial extracellular polymeric substances (EPSs) in ocean  
467 systems. *Frontiers in Microbiology*, 8, 922 (2017).
- 468 Deiner, K., Bik, H.M., Machler, E., Seymour, M., Lacoursiere-Roussel, A., Altermatt, F., Creer,  
469 S., Bista, I., Lodge, D.M., de Vere, N., Pfrender, M.E., & Bernatchez, L. Environmental DNA  
470 metabarcoding: transforming how we survey animal and plant communities, 26, 5872-5895  
471 (2017).
- 472 Derocles, S.A.P., Bohan, D.A., Dumbrell, A.J., Kitson, J.J.N., Massol, F., Pauvert, C.,  
473 Plantegenest, M., Vacher, C., & Evans, D.M. Biomonitoring for the 21<sup>st</sup> century: integrating  
474 next-generation sequencing into ecological network analysis. *Advances in Ecological Research*,  
475 58, 1-62 (2018).
- 476 Dickie, I.A., Boyer, S., Buckley, H.L., Duncan, R.P., Gardner, P.P., Hogg, I.D., Holdaway, R.J.,  
477 Lear, G., Makiola, A., Morales, S.E., Powell, J.R., & Weaver, L. Towards robust and repeatable  
478 sampling methods in eDNA-based studies. *Molecular Ecology Resources*, 18, 940-952 (2018).
- 479 Fonseca, V.G. Pitfalls in relative abundance estimation using eDNA metabarcoding. *Molecular*  
480 *Ecology Resources*, 18(5), 923-926, (2018).

- 481 Gao, Y., Truong, Y.B., Zhu, Y., & Kyratzis, L.I. Electrospun antibacterial nanofibers:  
482 production, activity, and in vivo applications. *Journal of Applied Polymer Science*, 15, 131  
483 (2014).
- 484 Hancock R.E.W. A brief on bacterial biofilms. *Nature Genetics*, 29, 360 (2009).
- 485 Jarman, S.N., Berry, O., & Bunce, M. The value of environmental DNA biobanking for long-  
486 term biomonitoring. *Nature Ecology & Evolution*, 2, 1192-1193 (2018).
- 487 Kharbush, J.J., Close, H.G., Van Mooy, B.A.S., Arnosti, C., Smittenberg, R.H., Le Moigne,  
488 F.A.C., Mollenhauer, G., Scholz-Bottcher, B., Obrecht, I., Koch, B.P., Becker, K.W., Iversen,  
489 M.H., & Mohr, W. Particulate organic carbon deconstructed: molecular and chemical  
490 composition of particulate organic carbon in the ocean. *Frontiers in Marine Science*, 7, 818  
491 (2020).
- 492 Kirtane, A., Atkinson, J.D., & Sassoubre, L. Design and validation of passive environmental  
493 DNA samplers using granular activated carbon and montmorillonite clay. *Environmental  
494 Science and Technology*, <https://dx.doi.org/10.1021/acs.est.0c01863> (2020).
- 495 Koziol, A., Stat, M., Simpson, T., Jarman, S., DiBattista, J.D., Harvey, E.S., Marnane, M.,  
496 McDonald, J., & Bunce, M. Environmental DNA metabarcoding studies are critically affected by  
497 substrate selection. *Molecular Ecology Resources*, 19(2), 366-376 (2019).
- 498 Lamb, P.D., Hunter, E., Pinnegar, J.K., Creer, S., Davies, R.G., & Taylor, M.I. How quantitative  
499 is metabarcoding: a meta-analytical approach. *Molecular Ecology*, 28(2), 420-430 (2019).
- 500 Liu, J.W. Adsorption of DNA onto gold nanoparticle and graphene oxide: surface science and  
501 applications. *Physical Chemistry Chemical Physics*, 14, 10485-10496.
- 502 Lorenz, M.G., & Wackernagel, W. Adsorption of DNA to sand and variable degradation rates of  
503 adsorbed DNA. *Applied and Environmental Microbiology*, 53, 2948-2952.
- 504 Mentges, A., Feenders, C., Seibt, M., Blasius, B. & Dittmar, T. Functional molecular diversity  
505 of marine dissolved organic matter is reduced during degradation. *Frontiers in Marine Science*,  
506 4, 194 (2017).
- 507 Murray, D. C., Coghlan, M. L. and Bunce, M. From benchtop to desktop: Important  
508 considerations when designing amplicon sequencing workflows. *PloS One*, 10, e0124671 (2015).
- 509 Pandit, K.R., Nanayakkara, I.A., Cao, W., Raghavan, S.R., & White, I.M. Capture and direct  
510 amplification of DNA on chitosan microparticles in a single PCR-optimal solution. *Analytical  
511 Chemistry*, 87, 11022-11029 (2015).
- 512 Prosser, J.I. Replicate or lie. *Environmental Microbiology*, 12(7), 1806-1810 (2010).
- 513 Strickland, G.J., & Roberts, J.H. Utility of eDNA and occupancy models for monitoring an  
514 endangered fish across diverse riverine habitats. *Hydrobiologia*, 826, 129-144 (2019).
- 515 Taberlet, P., Bonin, A., Zinger, L., & Coissac, E. *Environmental DNA, for biodiversity research  
516 and monitoring*. Oxford University Press, Oxford, United Kingdom (2018).

- 517 Thomsen, P.F., & Willerslev, E. Environmental DNA – an emerging tool in conservation for  
518 monitoring past and present biodiversity. *Biological Conservation*, **183**, 4-18 (2015).
- 519 Trujillo-Gonzalez, A., Villacorta-Rath, C., White, N.E., Furlan, E.M., Sykes, M., Grossel, G.,  
520 Divi, U.K., & Gleeson, D. Considerations for future environmental DNA accreditation and  
521 proficiency testing schemes. *Environmental DNA*. DOI: 10.1002/edn3.243.
- 522 Tsuji, S., Takahara, T., Doi, H., Shibata, N., & Yamanaka, H. The detection of aquatic  
523 macroorganisms using environmental DNA analysis – a review of methods for collection,  
524 extraction, and detection. *Environmental DNA*, **1**, 99-108 (2019).
- 525 Vilain, S., Pretorius, J.M., Theron, J., & Brozel, V.S. DNA as an adhesion: *Bacillus cereus*  
526 requires extracellular DNA to form biofilms. *Applied Environmental Microbiology*, **75**, 2861-  
527 2868 (2009).
- 528 Zinger, L., Bonin, A., Alsos, I.G., Balint, M., Bik, H., Boyer, F., Chariton, A.A., Creer, S.,  
529 Coissac, E., Deagle, B.E., De Barba, M., Dickie, I.A., Dumbrell, A.J., Ficetola, G.F., Fierer, N.,  
530 Fumagalli, L., Gilbert, M.T.P., Jarman, S., Jumpponen, A., Kauserud, H., Orlando, L., Pansu, J.,  
531 Pawlowski, J., Tedersoo, L., Thomsen, P.F., Willerslev, E., & Taberlet, P. DNA metabarcoding  
532 – need for robust experimental designs to draw sound ecological conclusions. *Molecular*  
533 *Ecology*, **28**, 1857-1862 (2019).

534 *Figure Legend*

535 Figure 1. Experimental design for testing passive eDNA collection with nine different membrane  
536 materials in a controlled mesocosm setting with varying soak times.

537 Figure 2. Mean Cq values from quantitative PCR by membrane material compared to  
538 conventional filtration of 1L eDNA samples. Note that both cotton and hemp were placed inside  
539 nylon bags. Lower Cq values indicate higher DNA yield and different letters indicate statistical  
540 significance ( $\alpha=0.05$ ).

541 Figure 3. Mean Cq values from quantitative PCR by submersion time for each membrane  
542 material. Open circles represent data for nylon bags (used with both cotton and hemp) which  
543 were sampled only at the end of the experiment. A smoothing spline (dashed line) is used to  
544 visualize possible time trends and could not be fitted for electrospun nanofibers due to the small  
545 sample size.

546 Figure 4. The number of fish species detected by membrane material compared to conventional  
547 filtration of 1L eDNA samples. Note that both cotton and hemp were placed inside nylon bags.  
548 Different letters indicate statistical significance ( $\alpha=0.05$ ).

549 Figure 5. The number of fish species detected by submersion time and membrane material.  
550 Open circles represent data for nylon bags (used with both cotton and hemp) which were  
551 sampled only at the end of the experiment. A smoothing spline (dashed line) is used to visualize  
552 possible time trends and could not be fitted for electrospun nanofibers due to the small sample  
553 size.

554 Figure 6. Scanning electron microscopy images of materials at 5000 x magnification after  
555 submersion in tank water where dashed circles identify biological matter. All scale bars are 10  
556  $\mu\text{m}$ .



557 Table 1. Materials trialled for passive eDNA collection accompanied by scanning electron microscopy pictures of each material at  
 558 10,000 x (Cellulose) and 100 x (all other materials) magnification, inlaid with pictures of the materials prior to deployment.

| Material                                         | Name                   | Supplier      | Description                                                            |
|--------------------------------------------------|------------------------|---------------|------------------------------------------------------------------------|
| Cellulose membrane                               | Cellulose              | Pall          | GN-6 Metrical® 0.45 µm 47 mm S-Pack white gridded                      |
| Cellulose + 1% chitosan                          | Chitosan – 1%          | Pall + CSIRO  | cellulose membrane covered with 1% chitosan solution                   |
| Cellulose + 3% chitosan                          | Chitosan – 3%          | Pall + CSIRO  | cellulose membrane covered with 3% chitosan solution                   |
| Cellulose + electrospun nanofibers               | Espun                  | Pall + CSIRO  | cellulose membrane covered with electrospun nanofibres                 |
| Cellulose + electrospun nanofibers + 1% chitosan | Espun w/ Chitosan      | Pall + CSIRO  | cellulose membrane covered with electrospun nanofibres and 1% chitosan |
| Cotton fibres in nylon bag                       | Cotton                 | Arbee         | 100% cotton secured in place using a nylon bag (Ribtex)                |
| Hemp fibres in nylon bag                         | Hemp                   | Shamrockcraft | twisted hemp cord secured in place using a nylon bag (Ribtex)          |
| Activated carbon sponge                          | Sponge – Active Carbon | Aqua One®     | tightly woven filter pad with 100% active carbon                       |
| Zeolite sponge                                   | Sponge - Zeolite       | Aqua One®     | tightly woven filter pad with enzyme bacteria and zeolite              |

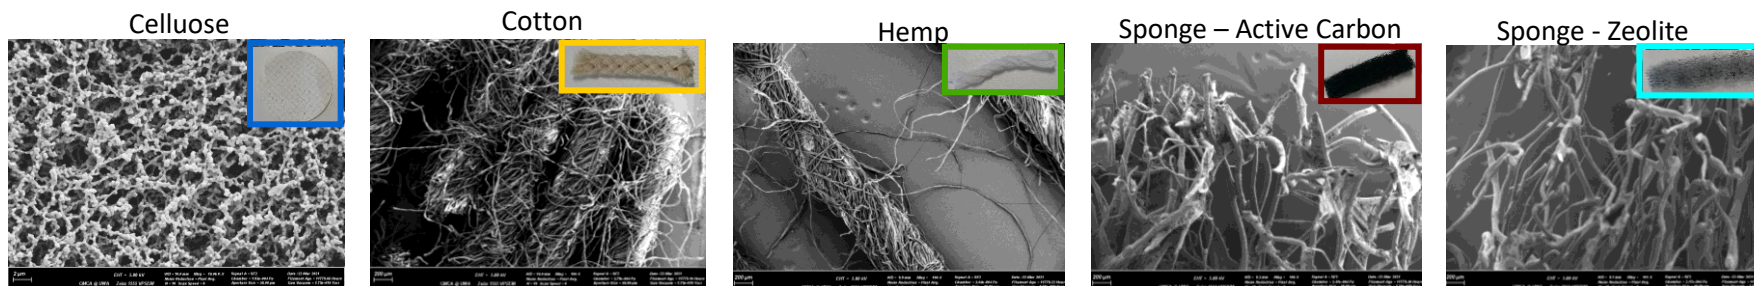

559

560 Table 2. Fish species inhabiting the main tank compared to those detected by passive eDNA collection, the materials upon which each  
 561 species were detected (C=cellulose, C1=chitosan-1%, C3=chitosan-3%, E=espun, ET=espun w/ chitosan, Cot=cotton, H=hemp, S-  
 562 AC=sponge-active carbon, S-Z=sponge-zeolite), the number of reads and associated comments per species (Y-g=yes to genus).

| Family          | Species                          | AQWA | eDNA | Materials                  | Reads   | Comments                              |
|-----------------|----------------------------------|------|------|----------------------------|---------|---------------------------------------|
| Aracanidae      | <i>Anoplocapros</i>              |      | Y    | C,C1,C3, E,ET, H, S-AC,S-Z | 394     | found in tanks running to filter tank |
| Arripidae       | <i>Arripis georgianus</i>        | Y    | Y    | All                        | 806729  |                                       |
|                 | <i>Arripis trutta</i>            | Y    | Y    | C1,C3,H                    | 893     |                                       |
| Aulopidae       | <i>Latropiscis purpurissatus</i> | Y    | Y    | C3,ET                      | 20      |                                       |
| Belonidae       | <i>Tylosurus crocodilus</i>      |      | Y    | H                          | 17      | found in local intake waters          |
| Carangidae      | Carangidae unknown               |      | Y    | All                        | 3884    |                                       |
|                 | <i>Pseudocaranx georgianus</i>   | Y    | Y-g  | All                        | 289581  |                                       |
|                 | <i>Seriola hippos</i>            | Y    | Y    | All                        | 29516   | detected as <i>Seriola lalandi</i>    |
|                 | <i>Trachurus declivis</i>        | Y    | Y-g  | All                        | 76500   |                                       |
| Carcharhinidae  | <i>Carcharias taurus</i>         | Y    | Y    | C,C1,C3,Cot,H,S-AC,S-Z     | 195     |                                       |
|                 | <i>Carcharhinus cautus</i>       | Y    | Y-g  | All                        | 1160    |                                       |
|                 | <i>Carcharhinus plumbeus</i>     | Y    |      |                            |         |                                       |
| Chaetodontidae  | <i>Chelmonops curiosus</i>       | Y    |      |                            |         |                                       |
|                 | <i>Heniochus diphreutes</i>      | Y    | Y    | All                        | 2340    |                                       |
| Clupeidae       | <i>Hyperlophus vittatus</i>      |      | Y    | C,C1,C3,ET,H,S-Z           | 220     | feed for mesocosm inhabitants         |
|                 | <i>Sardinella</i>                |      | Y    | All                        | 655224  | feed for mesocosm inhabitants         |
|                 | <i>Sardinops</i>                 |      | Y    | C,C1,C3,Cot,ET,E,S-AC,S-Z  | 487     | feed for mesocosm inhabitants         |
|                 | <i>Spratelloides delicatulus</i> |      | Y    | All                        | 40336   | feed for mesocosm inhabitants         |
| Dasyatidae      | <i>Bathytoshia brevicaudata</i>  | Y    | Y    | All                        | 1184978 |                                       |
| Diodontidae     | <i>Diodon nictemerus</i>         |      | Y    | C,C1,C3                    | 33      | found in tanks running to filter tank |
| Emmelichthyidae | <i>Emmelichthys nitidus</i>      |      | Y    | Cot,H                      | 108     | feed for mesocosm inhabitants         |
| Engraulidae     | <i>Engraulis</i>                 |      | Y    | All                        | 4346    | feed for mesocosm inhabitants         |
| Enoplosidae     | <i>Enoplosus armatus</i>         | Y    |      |                            |         |                                       |
| Ephippidae      | <i>Platax orbicularis</i>        |      | Y    | S-Z                        | 9       | found in tanks running to filter tank |
| Gadidae         | <i>Gadidae unknown</i>           |      | Y    | C,C3,S-Z                   | 41      |                                       |
| Girellidae      | <i>Girella tephraeops</i>        | Y    | Y-g  | All                        | 2718    |                                       |

|                |                                       |   |     |                          |       |                                                                               |
|----------------|---------------------------------------|---|-----|--------------------------|-------|-------------------------------------------------------------------------------|
| Glucosomatidae | <i>Glucosoma hebraicum</i>            | Y | Y   | All                      | 55325 | found in tank and also used as a positive control for two PCR plates          |
| Haemulidae     | <i>Plectorhinchus flavomaculatus</i>  | Y | Y   | All                      | 6890  |                                                                               |
|                | <i>Plectorhinchus polytaenia</i>      | Y | Y   | C,C1,C3,ET,E,H,S-AC,S-Z  | 1384  |                                                                               |
| Hemiscylliidae | <i>Chiloscyllium punctatum</i>        | Y |     |                          |       |                                                                               |
| Kyphosidae     | <i>Kyphosus sydneyanus</i>            | Y | Y-g | All                      | 1335  |                                                                               |
|                | <i>Microcanthus strigatus</i>         | Y | Y   | C,C1,C3,E,ET,H,S-AC,S-Z  | 357   |                                                                               |
| Labridae       | <i>Scorpis georgiana</i>              | Y | Y-g | All                      | 5059  |                                                                               |
|                | <i>Tilodon sexfasciatus</i>           | Y | Y   | C,C3,Cot,ET,E,H,S-AC,S-Z | 380   |                                                                               |
|                | <i>Bodianus frenchii</i>              | Y | Y-g | All                      | 826   |                                                                               |
|                | <i>Choerodon rubescens</i>            | Y | Y   | All                      | 13180 |                                                                               |
|                | <i>Coris auricularis</i>              | Y | Y-g | C1,C3,ET,E,H,S-Z         | 185   |                                                                               |
|                | <i>Labroides dimidiatus</i>           | Y | Y   | C3,Cot,H,S-AC            | 34    |                                                                               |
|                | <i>Notolabrus parilus</i>             | Y | Y   | All                      | 4403  |                                                                               |
| Latidae        | <i>Pseudolabrus biserialis</i>        | Y |     |                          |       |                                                                               |
|                | <i>Goniistius gibbosus</i>            | Y | Y-g | All                      | 1160  |                                                                               |
| Lethrinidae    | <i>Goniistius rubrolabiatus</i>       | Y | Y-g | All                      | 3053  |                                                                               |
|                | <i>Psammoperca datnioides</i>         | Y | Y   | C1,C3                    | 32    |                                                                               |
|                | <i>Lethrinus nebulosus</i>            | Y | Y   | All                      | 877   |                                                                               |
| Lutjanidae     | <i>Lutjanus</i>                       |   | Y   | C1,H                     | 106   |                                                                               |
| Monacanthidae  | <i>Paramonacanthus choirocephalus</i> |   | Y   | C,S-Z                    | 21    | found in tanks running to filter tank                                         |
| Monodactylidae | <i>Schuettea woodwardi</i>            | Y |     |                          |       |                                                                               |
| Mugilidae      | <i>Mugil cephalus</i>                 |   | Y   | All                      | 1137  | feed for mesocosm inhabitants                                                 |
| Mullidae       | <i>Parupeneus</i>                     |   | Y   | C1                       | 9     | found in tanks at aquarium                                                    |
|                | <i>Upeneus tragula</i>                |   | Y   | C,C3,Cot,H               | 106   | feed for mesocosm inhabitants detected as <i>Gymnothorax pseudothyrsoides</i> |
| Muraenidae     | <i>Gymnothorax woodwardi</i>          | Y | Y   | C1                       | 15    |                                                                               |
| Myliobatidae   | <i>Aetobatus narinari</i>             |   | Y   | C3, E, H, S-Z            | 598   |                                                                               |
|                | <i>Myliobatis tenuicaudatus</i>       | Y | Y   | All                      | 14066 |                                                                               |
| Nemipteridae   | <i>Pentapodus vitta</i>               | Y |     |                          |       |                                                                               |
| Osmeridae      | <i>Hypomesus</i>                      |   | Y   | All                      | 7693  | feed for mesocosm inhabitants                                                 |

|                  |                                  |   |     |                        |         |                                               |
|------------------|----------------------------------|---|-----|------------------------|---------|-----------------------------------------------|
| Ostraciidae      | <i>Ostracion</i>                 |   | Y   | S-AC                   | 8       | found in tanks at aquarium                    |
| Pempheridae      | <i>Parapriacanthus elongatus</i> |   | Y   | C,C1,C3,ET,E,S-AC,S-Z  | 77      | found in tanks running to filter tank         |
|                  | <i>Pempheris klunzingeri</i>     | Y | Y   | All                    | 1363    | detected as <i>Pempheris cf. multiradiata</i> |
| Platycephalidae  | <i>Inegocia japonica</i>         |   | Y   | Cot                    | 19      | found in tanks running to filter tank         |
| Plesiopidae      | <i>Paraplesiops meleagris</i>    | Y |     |                        |         |                                               |
| Pomacentridae    | <i>Chromis</i>                   |   | Y   | C,C1,C3,E,ET,S-AC,S-Z  | 226     | found in tanks running to filter tank         |
|                  | <i>Parma mccullochi</i>          | Y | Y   | C3,ET,E,S-Z            | 197     | detected as <i>Parma microlepis</i>           |
|                  | <i>Pomatomus saltatrix</i>       | Y | Y   | All                    | 19246   |                                               |
| Sciaenidae       | <i>Argyrosomus japonicus</i>     | Y | Y   | All                    | 616576  |                                               |
| Scombridae       | <i>Scombridae unknown</i>        |   | Y   | All                    | 7411    | feed for aquarium inhabitants                 |
| Serranidae       | <i>Epinephelides armatus</i>     | Y |     |                        |         |                                               |
|                  | <i>Epinephelus malabaricus</i>   | Y | Y-g | All                    | 4516    |                                               |
|                  | <i>Ephinephilus rivulatus</i>    | Y |     |                        |         |                                               |
|                  | <i>Othos dentex</i>              | Y |     |                        |         |                                               |
|                  | <i>Pseudanthias dispar</i>       |   | Y   | C3,ET,E,H,S-Z          | 92      | found in tanks running to filter tank         |
|                  | <i>Variola louti</i>             |   | Y   | ET                     | 10      |                                               |
| Siganidae        | <i>Siganus doliatus</i>          |   | Y   | C3,Cot                 | 48      | found in tanks running to filter tank         |
| Sillaginidae     | <i>Sillago ingenuua</i>          |   | Y   | All                    | 702881  | feed for mesocosm inhabitants                 |
| Sparidae         | <i>Acanthopagrus butcheri</i>    | Y | Y-g | All                    | 1374144 |                                               |
|                  | <i>Chrysophrys auratus</i>       | Y | Y   | All                    | 2577546 |                                               |
|                  | <i>Rhabdosargus sarba</i>        | Y | Y   | All                    | 5012    |                                               |
| Synodontidae     | <i>Synodontidae unknown</i>      |   | Y   | C1,C3,Cot              | 57      | feed for mesocosm inhabitants                 |
| Terapontidae     | <i>Helotes octolineatus</i>      |   | Y   | C,C1,C3,Cot,H,S-AC,S-Z | 716     | feed for mesocosm inhabitants                 |
|                  | <i>Torquigener pleurogramma</i>  |   | Y   | All                    | 1413    | feed for mesocosm inhabitants                 |
| Toxotidae        | <i>Toxotidae unknown</i>         |   | Y   | C1,C3                  | 20      | found in tanks running to filter tank         |
| Triakidae        | <i>Triakidae unknown</i>         |   | Y   | E                      | 42      | found in tanks running to filter tank         |
| Trygonorrhinidae | <i>Aptychotrema vincentiana</i>  | Y |     |                        |         |                                               |
|                  | <i>Trygonorrhina fasciata</i>    | Y | Y   | S-Z                    | 9       | detected as <i>Trygonorrhina guanerius</i>    |

564 Figure 1  
565

### Experimental Apparatus

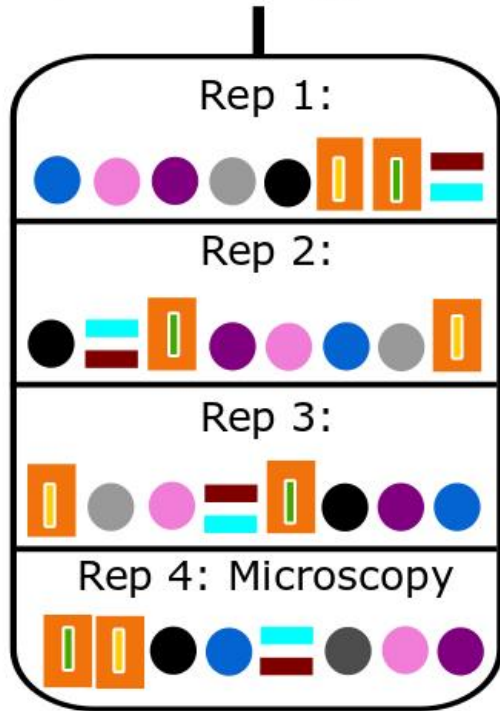

9 different materials

### Deployed in Aquarium

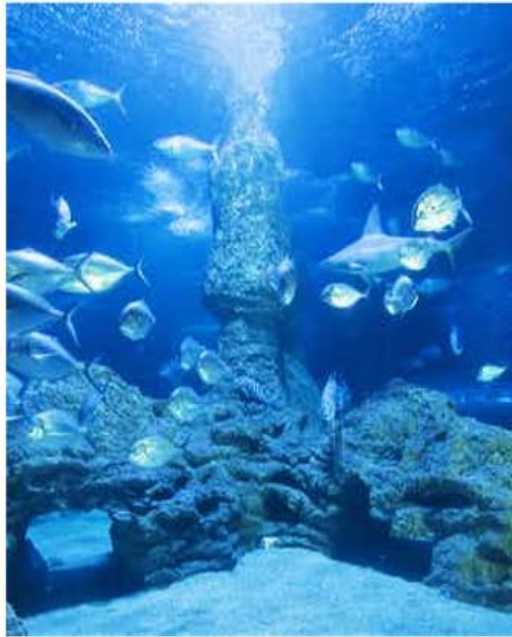

### Submersion Time

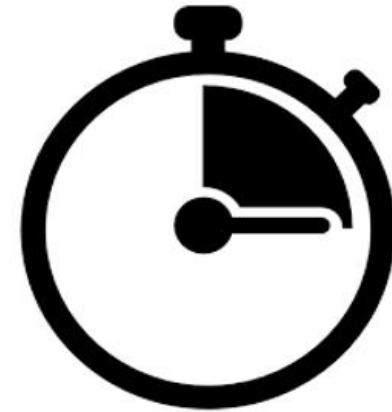

5, 10, 30, 60 minutes  
18 hours

566

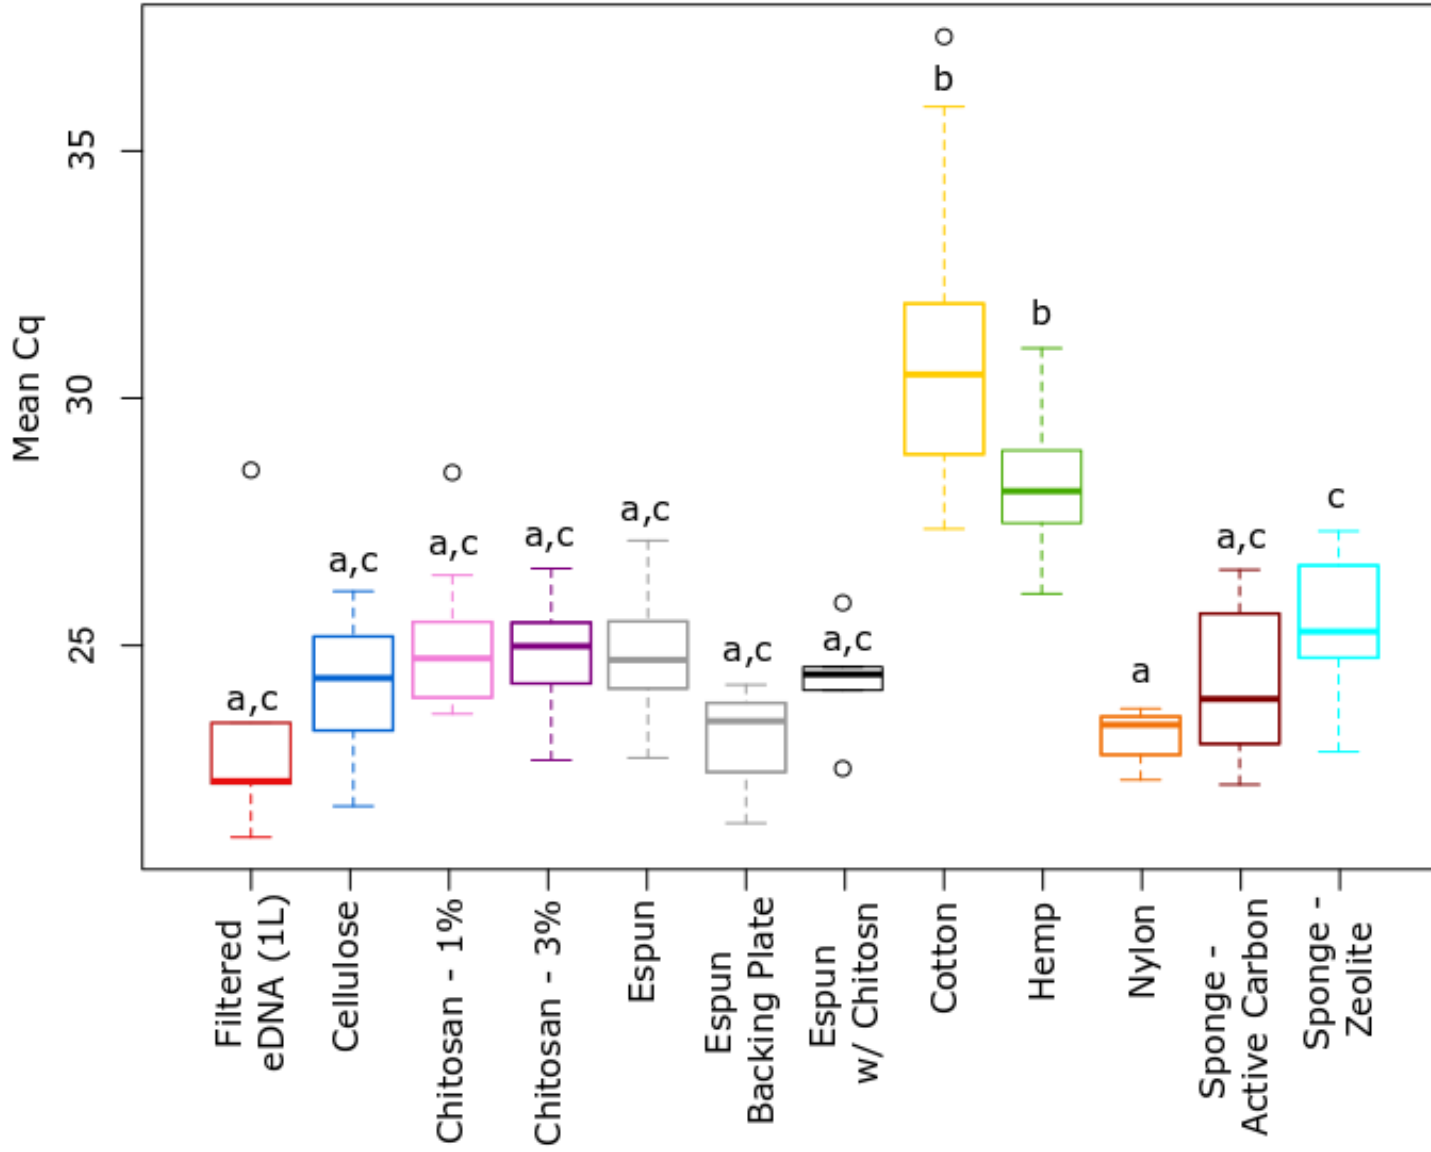

569 Figure 3

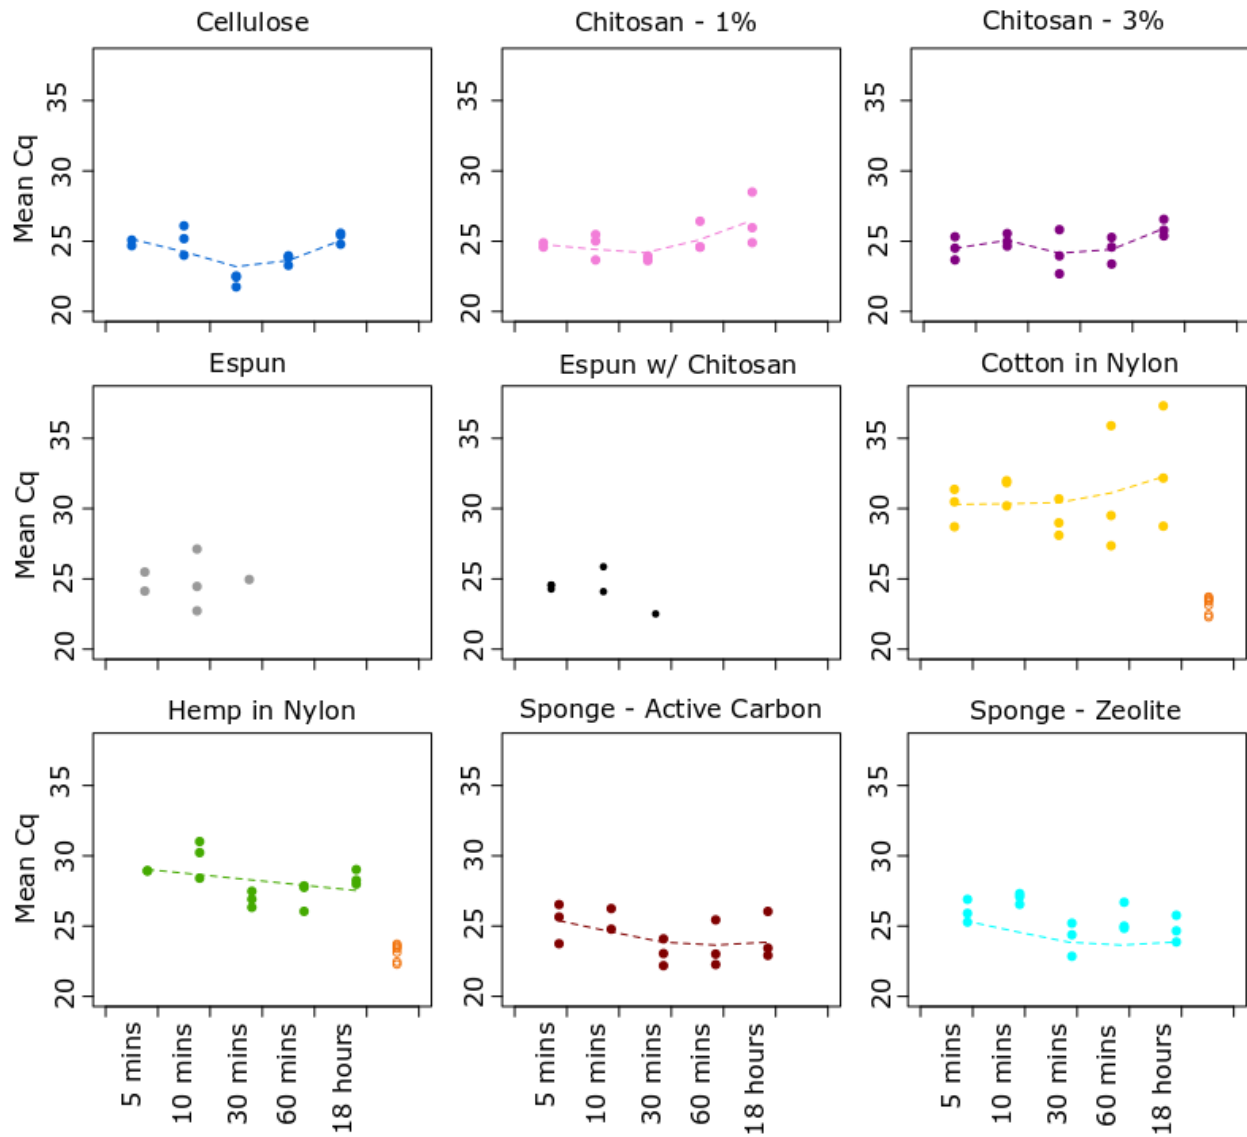

570

571 Figure 4  
572

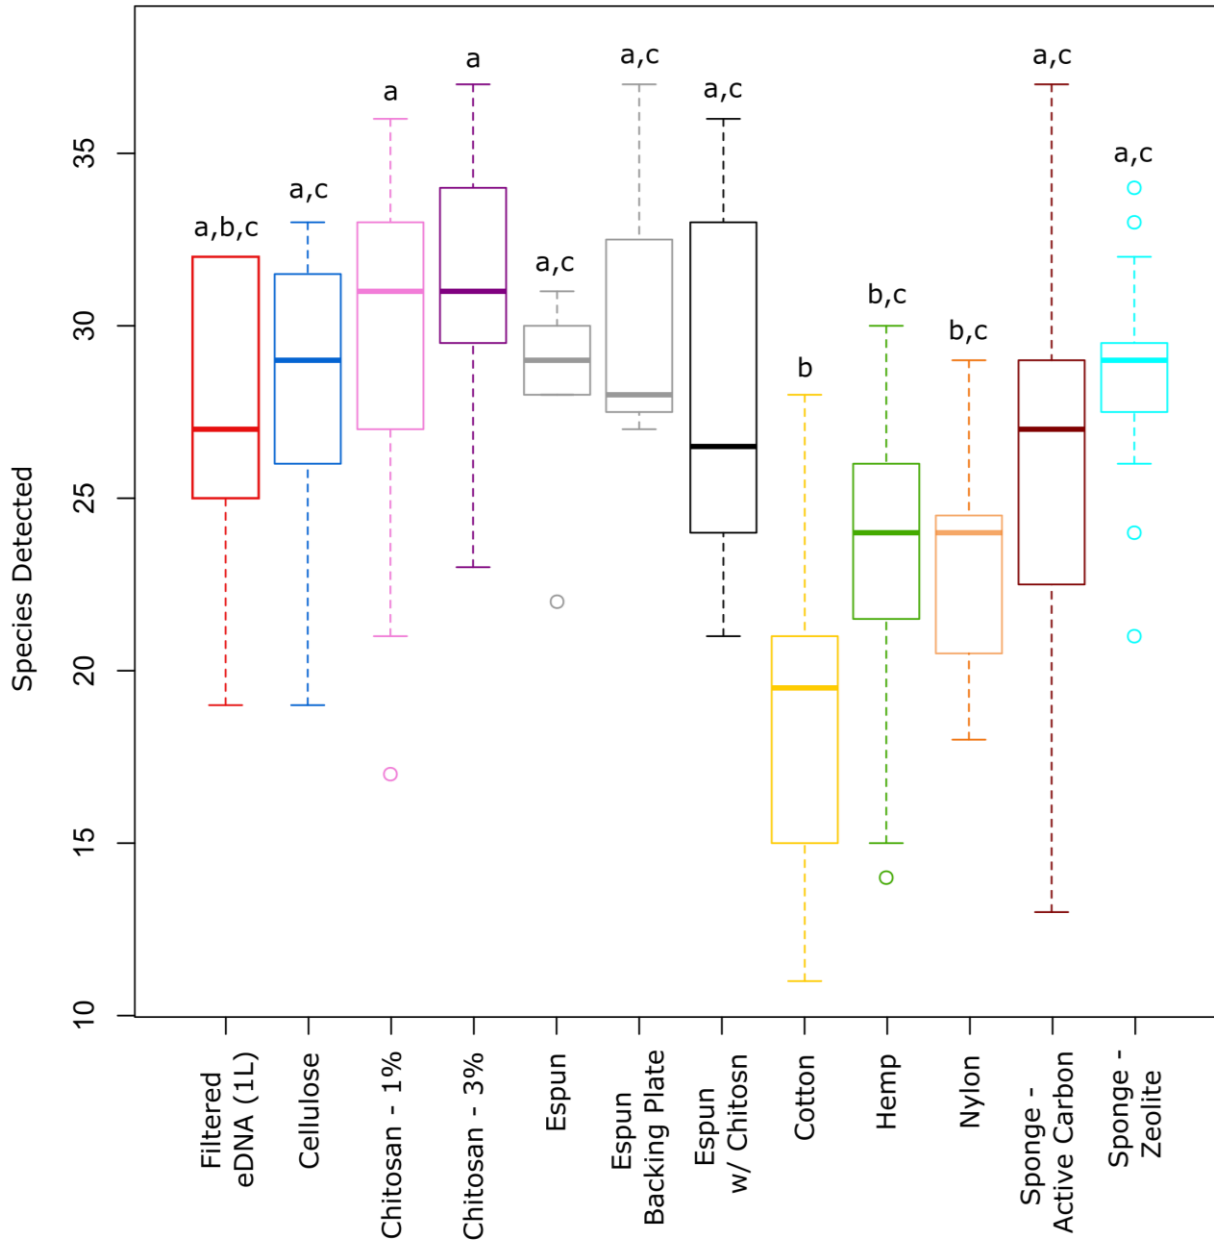

573



574 Figure 5

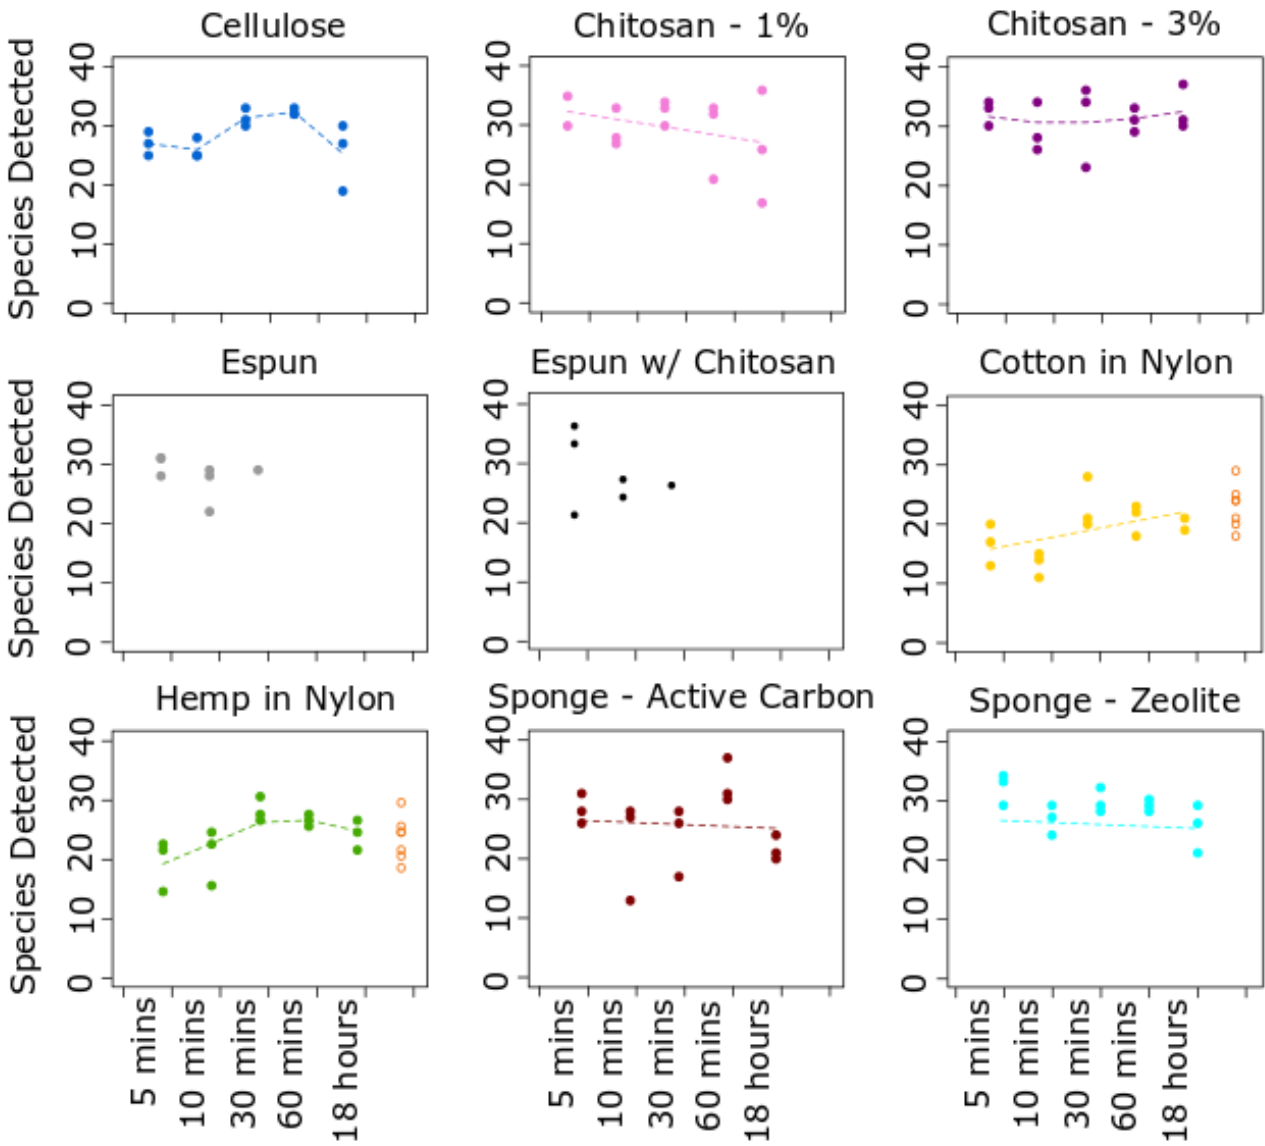

575

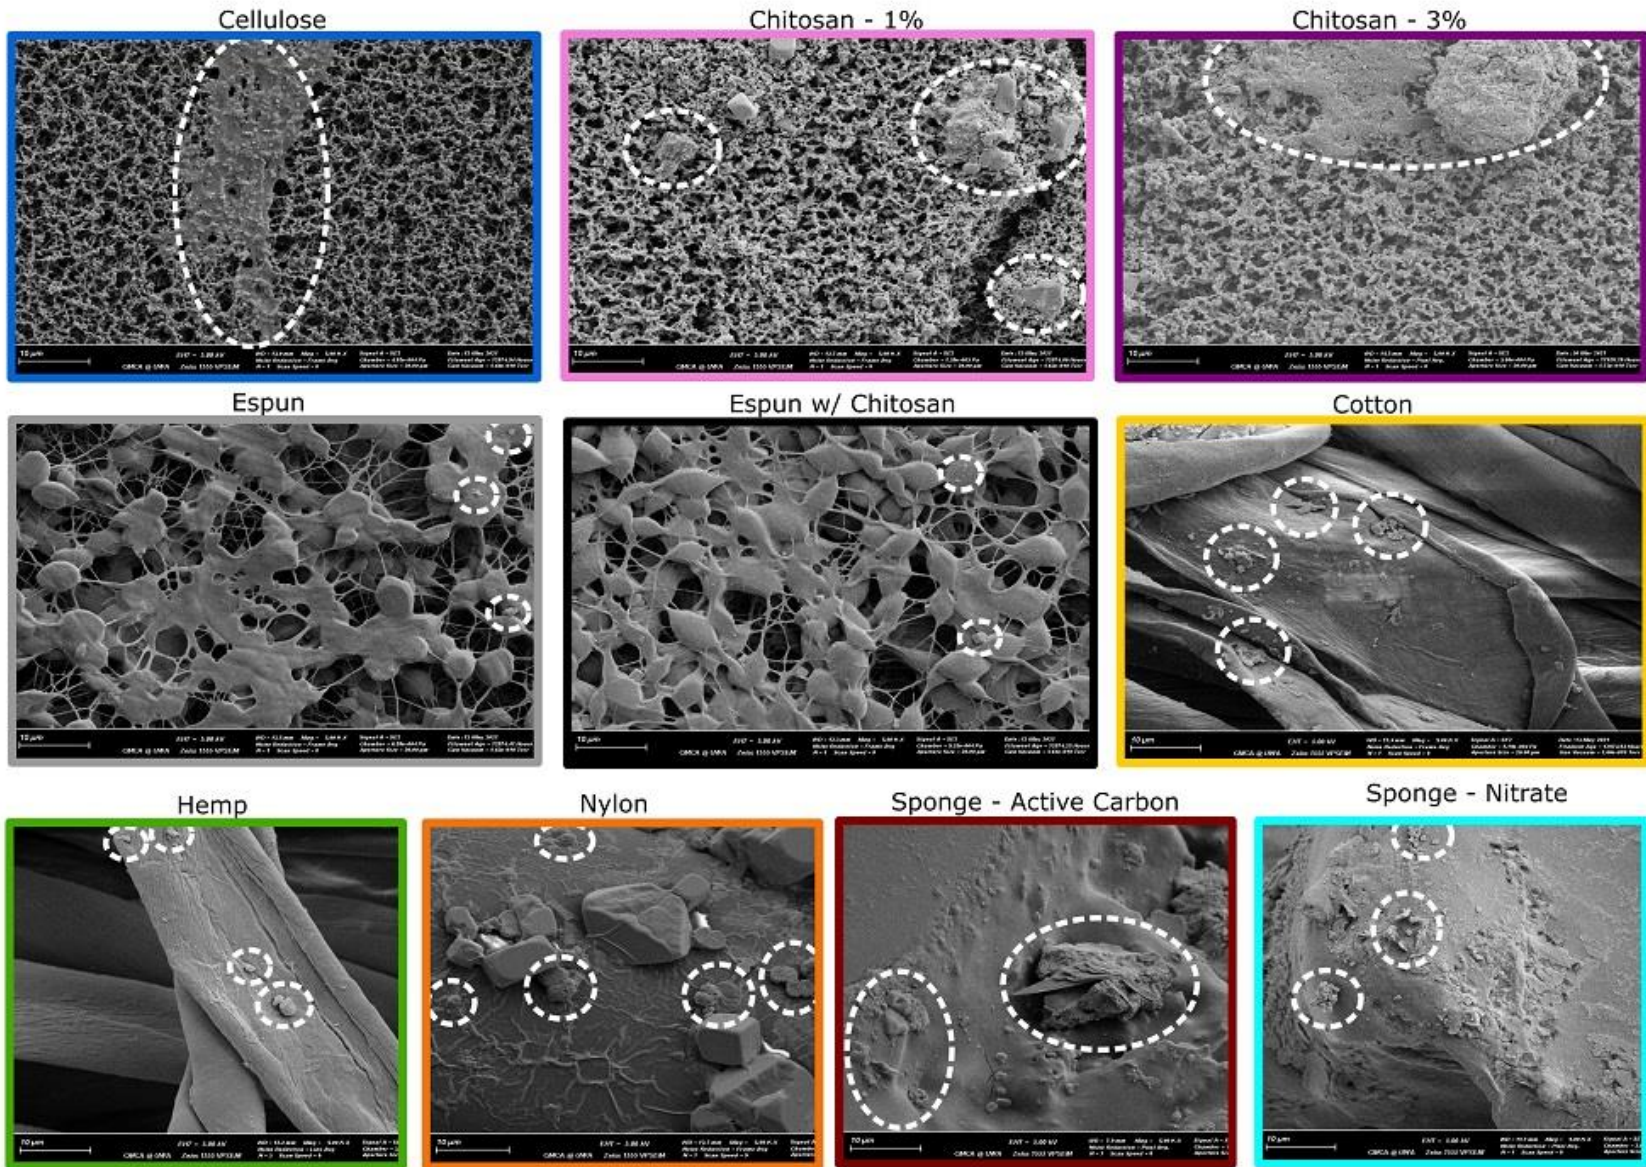

Source: https://www.biorxiv.org/content/biorxiv/early/2021/11/10/2021.11.08.467842.full.pdf
